# Supplementary material for: Early detection of cancer in the general population: a blinded case–control study of p53 autoantibodies in colorectal cancer
Source: PubMed Central journal article supplement — Br J Cancer. 2012 Nov 20;108(1):107–14. doi: 10.1038/bjc.2012.517 (PMC3553520; doi:10.1038/bjc.2012.517), 2012-11-20
Supplement: bjc2012517x1.pdf [file bjc2012517x1.pdf]

## Supplementary data 1, Pedersen, Gentry-Maharaj *et al.*

### p53 peptide sequences

|        |                  |
|--------|------------------|
| p53-1  | MEEFQSDPSVEPPLS  |
| p53-2  | SDPSVEPPLSQETFSS |
| p53-3  | EPFLSQETFSDLWKL  |
| p53-4  | QETFSDLWKLLEN    |
| p53-5  | DLWKLLENVLSPL    |
| p53-6  | LPENNVLSPLPSQAM  |
| p53-7  | VLSPLPSQAMDDLML  |
| p53-8  | PSQAMDDLMLSPDDI  |
| p53-9  | DDLMLSPDDIEQWFT  |
| p53-10 | SPDDIEQWFTEDPGP  |
| p53-11 | EQWFTEDPGPDEAPR  |
| p53-12 | EDPGPDEAPRMEPEAA |
| p53-13 | DEAPRMEAPRVAP    |
| p53-14 | MPEAAPRVAPAPAAP  |
| p53-15 | PRVAPAPAAFTPAAP  |
| p53-16 | APAAFTPAAPAPAPS  |
| p53-17 | TPAAPAPAPSWPLSS  |
| p53-18 | APAPSWPLSSVPSQ   |
| p53-19 | WPLSSVPSQKTYQG   |
| p53-20 | SVPSQKTYQGSYGFR  |
| p53-21 | KTYQGSYGFRLGFLH  |
| p53-22 | SYGFRGFLHSGTAK   |
| p53-23 | LGFLHSGTAKSVTCT  |
| p53-24 | SGTAKSVTCTYSPAL  |
| p53-25 | SVTCTYSPALNKMFC  |
| p53-26 | YSPALNKMFCQLAKT  |
| p53-27 | NKMFCQLAKTCPVQL  |
| p53-28 | QLAKTCPVQLWVDST  |
| p53-29 | CPVQLWVDSTPEPGT  |
| p53-30 | WVDSTPEPGTRVRAM  |
| p53-31 | PPPGTRVRAMAIYKQ  |
| p53-32 | RVRAMAIYKQSQHMT  |
| p53-33 | AIYKQSQHMTVVRR   |
| p53-34 | SQHMTVVRRCPHHE   |
| p53-35 | EVVRRCPHHERCSDS  |
| p53-36 | CPHHERCSDSDGLAP  |
| p53-37 | RCSDSGLAPPQHLLI  |
| p53-38 | DGLAPPQHLLIRVEGN |
| p53-39 | PQHLLIRVEGNLRVEY |
| p53-40 | RVEGNLRVEYLDDRN  |
| p53-41 | LRVEYLDDRNTRFRHS |
| p53-42 | LDDRNTRFRHSVVVPY |
| p53-43 | TRFRHSVVVPYEPFEV |
| p53-44 | VVVPYEPFEVGSDC   |
| p53-45 | EPFEVGSDCCTIHYN  |
| p53-46 | GSDCCTIHYNYMCNS  |
| p53-47 | TIHYNYMCNSSCMGG  |
| p53-48 | YMCNSSCMGMNRRP   |
| p53-49 | SCMGMNRRPILTI    |
| p53-50 | MNRRPILTIITLED   |
| p53-51 | TLEDSSGNLLGRNSF  |
| p53-52 | SGNLLGRNSFEVRVC  |
| p53-53 | GRNSFEVRVCACFGR  |
| p53-54 | EVRVACACFGRDRRTE |
| p53-55 | ACFGRDRRTEENLR   |
| p53-56 | DRRTEENLRKKGEP   |
| p53-57 | EENLRKKGEPHHELP  |
| p53-58 | KKGEPHHELPGGSTK  |
| p53-59 | HHELPGGSTKRALPN  |
| p53-60 | PGSTKRALPNNTSSS  |
| p53-61 | RALPNNTSSSPQPKK  |
| p53-62 | NTSSSPQPKKPLDG   |
| p53-63 | PQPKKPLDG EYFTL  |
| p53-64 | KPLDG EYFTLQIRGR |
| p53-65 | EYFTLQIRGRERFEM  |
| p53-66 | QIRGRERFEMFRELN  |
| p53-67 | ERFEMFRELN EALEL |
| p53-68 | FRELN EALELKDQA  |
| p53-69 | EALELKDQA GKEPG  |
| p53-70 | KDQA GKEPGGSR    |
| p53-71 | GKEPGGSR AHGKEPG |
| p53-72 | GSR AHGKEPGGSR   |
| p53-73 | GKEPGGSR AHSSHLK |
| p53-74 | GSR AHSSHLKSKGQ  |
| p53-75 | SSHLKSKGQSTSRH   |
| p53-76 | SKGQSTSRHKKLMF   |
| p53-77 | STSRHKKLMFKTEGP  |
| p53-78 | KKLMFKTEGPDSD    |
