# Supplementary material for: Early detection of cancer in the general population: a blinded case–control study of p53 autoantibodies in colorectal cancer
Source: PubMed Central journal article supplement — Br J Cancer. 2012 Nov 20;108(1):107–14. doi: 10.1038/bjc.2012.517 (PMC3553520; doi:10.1038/bjc.2012.517), 2012-11-20
Supplement: bjc2012517x2.pdf [file bjc2012517x2.pdf]

## Supplementary data 2, Pedersen, Gentry-Maharaj et al.

|               | p53-10      | p53-9       | p53-78      | p53-25      | p53-44      | p53-5       | p53-26      | p53-43      | p53-58      | p53-34      | p53-42      |
|---------------|-------------|-------------|-------------|-------------|-------------|-------------|-------------|-------------|-------------|-------------|-------------|
| 1CA           | 0           | 0           | 0.54        | 0           | 0           | 0           | 0           | 0           | 0           | 0           | 0           |
| 2CA           | 0           | 0           | 0           | 0           | 0           | 0           | 0           | 0           | 0           | 0           | 0           |
| 3CA           | 0           | 0           | 0           | 0           | 0           | 0           | 0           | 0           | 0           | 0           | 0           |
| 4CA           | 0           | 0           | 0           | 0           | 0           | 0           | 0           | 0           | 0           | 0           | 0           |
| 5CA           | 0           | 0           | 0           | 0           | 0           | 0           | 3.05*       | 0           | 0           | 0           | 1.04        |
| 6CA           | 0           | 0           | 0           | 0           | 0           | 0           | 0           | 0           | 0           | 1.84        | 0           |
| 7CA           | 0           | 0           | 0           | 0           | 0           | 0           | 0           | 0           | 0           | 2.3         | 0           |
| 8CA           | 0.19        | 0           | 0           | 0           | 0           | 0           | 0           | 0           | 0           | 0           | 0.19        |
| 9CA           | 2.78*       | 2.78*       | 2.78*       | 0           | 2.78*       | 2.78*       | 0           | 0           | 0           | 0           | 0           |
| 10CA          | 0           | 0           | 0           | 0           | 0           | 0           | 0           | 0           | 0           | 2.78*       | 0           |
| 11CA          | 0           | 0           | 0           | 0           | 0           | 0           | 0           | 0           | 0           | 0           | 0           |
| 12CA          | 0           | 0           | 0           | 0           | 0           | 0           | 0           | 0           | 2.72*       | 0           | 0           |
| 13CA          | 0           | 0           | 0           | 0           | 0           | 0           | 0           | 0           | 0           | 0           | 0           |
| 14CA          | 0           | 0           | 0           | 0.5         | 0           | 0           | 0           | 0           | 2.56*       | 0           | 0           |
| 15CA          | 0           | 0           | 0           | 0           | 0           | 0.54        | 0           | 0           | 0           | 0           | 0           |
| 16CA          | 0.7         | 1.75        | 1.75*       | 1.75*       | 0           | 0           | 0           | 0           | 0.7         | 0           | 0           |
| 17CA          | 0           | 0           | 0           | 0           | 0           | 0           | 0           | 0           | 0           | 0           | 0           |
| 18CA          | 0           | 0           | 0           | 0           | 0           | 0           | 2.24        | 0           | 0           | 0           | 0           |
| 19CA          | 0           | 0           | 0           | 0           | 0           | 0           | 0           | 0           | 0           | 0           | 0           |
| 20CA          | 0           | 0           | 0           | 0           | 0           | 0           | 0           | 0           | 0           | 0           | 0           |
| 21CA          | 0           | 0           | 0           | 0           | 0           | 0           | 0           | 0           | 0           | 0           | 0           |
| 22CA          | 0           | 0           | 0           | 0           | 0           | 0           | 4.49*       | 0           | 4.49*       | 0           | 0           |
| 23CA          | 0           | 0           | 0           | 0           | 0           | 0           | 0           | 0           | 0           | 0           | 0           |
| 24CA          | 0           | 0           | 0           | 0           | 0           | 0           | 4.69*       | 0           | 0           | 4.69*       | 0           |
| 25CA          | 0           | 0           | 0           | 0           | 0.69        | 0           | 0           | 0.69        | 0           | 0           | 0           |
| 26CA          | 0           | 0           | 0           | 0           | 0           | 0           | 0           | 0           | 0           | 0           | 0.92        |
| 27CA          | 2.16        | 1.17        | 1.17        | 1.17        | 1.17        | 2.16        | 1.17        | 1.17        | 1.17        | 0           | 0           |
| 28CA          | 0           | 0           | 0.8         | 0           | 0           | 0           | 0           | 0           | 0           | 0           | 0           |
| 29CA          | 3.22*       | 0           | 3.22*       | 3.22*       | 0           | 0           | 0           | 0           | 3.22*       | 0           | 0           |
| 30CA          | 0           | 0           | 0           | 0           | 0           | 0           | 0           | 0           | 0           | 0           | 0           |
| 31CA          | 2.58        | 0           | 0           | 0.52        | 0           | 0           | 0           | 0           | 0           | 0           | 3.72*       |
| 32CA          | 0           | 0           | 0           | 0           | 0           | 0           | 0           | 0           | 0           | 4.69*       | 0           |
| 33CA          | 0           | 0           | 0           | 0           | 0           | 0           | 0           | 0           | 0           | 1.46*       | 0.23        |
| 34CA          | 0           | 0           | 0           | 3.23*       | 0           | 0           | 0           | 0           | 0           | 0           | 0           |
| 35CA          | 1.44*       | 1.44*       | 1.44*       | 1.44*       | 1.44*       | 1.44*       | 1.44*       | 1.44*       | 1.44*       | 0           | 1.44*       |
| 36CA          | 0           | 0           | 0           | 0           | 0           | 0           | 0           | 0           | 0           | 0           | 0           |
| 37CA          | 0           | 0           | 0           | 0           | 0           | 0           | 0           | 0           | 0           | 0           | 0           |
| 38CA          | 0           | 0           | 0           | 0           | 3.91*       | 0           | 0           | 0           | 0           | 0           | 0           |
| 39CA          | 3.8*        | 3.8*        | 0           | 0           | 0           | 0           | 0           | 0           | 0           | 0           | 0           |
| 40CA          | 0.21        | 0.21        | 0.21        | 0           | 0           | 0.21        | 0           | 0.21        | 0           | 0           | 0           |
| 41CA          | 0           | 0           | 0           | 0.96        | 0           | 0           | 0           | 0           | 0           | 2.41*       | 0           |
| 42CA          | 0           | 0           | 0           | 0           | 0           | 0           | 1.98*       | 0           | 0           | 0           | 0           |
| 43CA          | 0           | 0           | 0           | 0           | 0           | 0           | 0           | 0           | 0           | 0           | 0           |
| 44CA          | 0           | 0           | 0           | 1.04        | 0           | 0           | 0           | 0           | 1.04        | 0           | 0           |
| 45CA          | 0           | 0           | 0           | 0           | 0           | 0           | 0           | 0           | 0           | 0           | 0           |
| 46CA          | 0           | 0           | 0           | 0           | 0           | 0           | 0           | 0           | 0           | 0           | 0           |
| 47CA          | 0           | 0           | 0           | 2.44*       | 0           | 0           | 0           | 0           | 0           | 0           | 0           |
| 48CA          | 0           | 0           | 0           | 0           | 0           | 0           | 0           | 0           | 0           | 0           | 0           |
| 49CA          | 1.23*       | 1.23*       | 0.14        | 1.23*       | 1.23*       | 1.23*       | 1.23*       | 1.23*       | 0           | 0           | 0.14        |
| 50CA          | 0           | 0           | 0           | 0           | 0           | 0           | 0.33        | 0           | 0           | 0           | 0           |
| 51CA          | 0           | 0           | 0           | 0           | 0           | 0           | 0           | 0           | 0           | 2.89*       | 0           |
| 52CA          | 0           | 0           | 0           | 0           | 0           | 0           | 1.37*       | 1.37*       | 0           | 0           | 0           |
| 53CA          | 0           | 0           | 1.07        | 0           | 0           | 0           | 0           | 0           | 0           | 0           | 0           |
| 54CA          | 0           | 0           | 0           | 0           | 0           | 0           | 0           | 0           | 0           | 0           | 0           |
| 55CA          | 1.02*       | 1.02*       | 0           | 0           | 0           | 0           | 0           | 0           | 0           | 0           | 0           |
| 56CA          | 0           | 0           | 0           | 0           | 0           | 0           | 0           | 0           | 0           | 0           | 0           |
| 57CA          | 1.91*       | 0           | 1.91*       | 1.91*       | 0.87        | 0           | 0.87        | 0           | 0           | 0           | 0           |
| 58CA          | 0           | 0           | 0           | 0           | 0           | 0           | 0           | 0           | 0           | 0           | 0           |
| 59CA          | 0           | 0           | 0           | 0           | 0           | 0           | 0           | 0           | 0           | 0           | 0           |
| 60CA          | 2.07        | 0.92        | 0           | 0           | 0           | 0.92        | 0           | 0           | 0           | 0           | 0           |
| 61CA          | 0           | 0           | 0           | 0           | 0           | 0           | 2.27*       | 0           | 0           | 0           | 0           |
| 62CA          | 0           | 0           | 0           | 0           | 0           | 0           | 0           | 0           | 0           | 0           | 0           |
| 63CA          | 0           | 0           | 0           | 0           | 0           | 0           | 0           | 0           | 0           | 0           | 0           |
| 64CA          | 0.9         | 0.9         | 1.14        | 0.45        | 2.13        | 0.45        | 0           | 0.45        | 2.13        | 0           | 0.45        |
| 65CA          | 0           | 0           | 0           | 0           | 0           | 0           | 0           | 0           | 0           | 0           | 0           |
| 66CA          | 0           | 0           | 0           | 0           | 0           | 0           | 0           | 1.32*       | 0           | 0           | 0           |
| 67CA          | 0           | 0           | 0           | 0           | 0           | 0           | 0           | 0           | 0           | 0           | 0           |
| 68CA          | 0           | 1.95*       | 1.95*       | 1.95*       | 1.95*       | 1.95*       | 0           | 1.95*       | 0           | 0           | 0           |
| 69CA          | 0           | 0           | 0           | 0           | 0           | 0           | 0           | 0           | 0           | 0           | 0           |
| 70CA          | 0           | 0           | 0           | 0           | 0           | 0           | 0           | 0           | 0           | 0           | 0           |
| 71CA          | 0.48        | 0.48        | 0           | 0           | 0           | 0.48        | 0           | 0           | 0           | 0           | 0           |
| 72CA          | 0           | 0           | 0           | 0           | 0           | 0           | 0           | 0           | 0           | 0           | 0           |
| 73CA          | 0           | 0           | 0           | 0           | 0           | 0           | 0           | 0           | 0           | 0           | 0           |
| 74CA          | 0           | 0           | 0           | 0           | 0           | 0           | 0           | 0           | 0           | 0           | 0.60        |
| 75CA          | 0           | 3.58*       | 0           | 0           | 0           | 0           | 0           | 0           | 0           | 0           | 0           |
| 76CA          | 0           | 0           | 0           | 0           | 0           | 0           | 0           | 0           | 0           | 0           | 0           |
| 77CA          | 0           | 0           | 0           | 0           | 0           | 0           | 0           | 0           | 0           | 0.89*       | 0           |
| 78CA          | 0.12        | 0.12        | 0           | 0.12        | 0           | 0           | 0           | 0           | 0           | 0           | 0           |
| 79CA          | 1.55*       | 1.55*       | 0           | 0           | 0           | 0           | 0           | 0           | 0           | 0           | 0           |
| 80CA          | 1.73        | 2.53        | 2.53        | 3.85*       | 2.53        | 0           | 0           | 0           | 2.53        | 2.53        | 0           |
| 81CA          | 2.59*       | 2.59*       | 0           | 2.59*       | 2.59*       | 0           | 0           | 2.59*       | 2.59*       | 0           | 0           |
| 82CA          | 0           | 0           | 0           | 0           | 0           | 0           | 0           | 0           | 0           | 0           | 0           |
| 83CA          | 0           | 0           | 0.78        | 0           | 0           | 0           | 0           | 0           | 0           | 0           | 0           |
| 84CA          | 0.25        | 1.36        | 0.25        | 0.25        | 0           | 1.36        | 0           | 0           | 0.25        | 0.25        | 0.25        |
| 85CA          | 0           | 0           | 0           | 0           | 0           | 0           | 0           | 0           | 0           | 3.43*       | 0           |
| 86CA          | 0           | 0           | 0           | 0           | 0           | 0           | 0           | 0           | 0           | 0           | 0           |
| 87CA          | 0           | 0           | 0           | 0           | 0           | 0           | 0           | 0           | 0           | 0           | 0           |
| 88CA          | 1.51        | 0           | 0           | 0           | 1.51        | 2.6*        | 0           | 1.51        | 0           | 0           | 0           |
| 89CA          | 0           | 0           | 0.67        | 0           | 0           | 0           | 0           | 0           | 0           | 0           | 0           |
| 90CA          | 0           | 0           | 2.45*       | 0           | 0           | 0           | 0           | 0           | 0           | 0           | 0           |
| 91CA          | 2.24*       | 2.24*       | 2.24*       | 0           | 2.24*       | 2.24*       | 0           | 2.24*       | 0           | 0           | 0           |
| 92CA          | 0           | 1.01        | 0           | 0           | 0           | 0           | 0           | 0           | 0           | 0           | 0           |
| 93CA          | 0           | 0           | 0           | 0           | 0           | 0           | 0           | 0           | 0           | 0           | 0           |
| 94CA          | 0           | 0           | 0           | 0           | 0           | 0           | 0           | 0           | 0           | 0           | 0.67        |
| 95CA          | 0           | 0           | 0           | 0           | 0           | 0           | 0           | 0           | 0           | 0           | 0           |
| 96CA          | 0           | 0           | 0           | 0           | 2.33*       | 0           | 0           | 2.33*       | 0           | 0           | 0           |
| 97CA          | 0.78        | 0.78        | 2.93*       | 2.93*       | 0           | 0           | 0.78        | 0           | 2.93*       | 0           | 0           |
| <b>Median</b> | <b>1.51</b> | <b>1.36</b> | <b>1.31</b> | <b>1.44</b> | <b>2.04</b> | <b>1.36</b> | <b>1.44</b> | <b>1.37</b> | <b>2.53</b> | <b>2.53</b> | <b>0.60</b> |
