# Supplementary material for: Early detection of cancer in the general population: a blinded case–control study of p53 autoantibodies in colorectal cancer
Source: PubMed Central journal article supplement — Br J Cancer. 2012 Nov 20;108(1):107–14. doi: 10.1038/bjc.2012.517 (PMC3553520; doi:10.1038/bjc.2012.517), 2012-11-20
Supplement: bjc2012517x4.pdf [file bjc2012517x4.pdf]

Supplementary data 4, Pedersen, Gentry-Maharaj et al.

| CASE ID IN ORDER OF MOST POSITIVE PEPTIDES<br>29 CASES NEGATIVE WITH ALL PEPTIDES | PEPTIDE IN ORDER OF SENSITIVITY |    |    |    |    |    |    |    |    |    |    |    |    |   |    |    |    |    | Total | %     |       |
|-----------------------------------------------------------------------------------|---------------------------------|----|----|----|----|----|----|----|----|----|----|----|----|---|----|----|----|----|-------|-------|-------|
|                                                                                   | 10                              | 9  | 78 | 25 | 44 | 5  | 26 | 43 | 58 | 34 | 42 | 27 | 59 | 4 | 45 | 14 | 41 | 39 |       |       |       |
| 35                                                                                | 1                               | 1  | 1  | 1  | 1  | 1  | 1  | 1  | 1  | 1  | 0  | 1  | 1  | 1 | 0  | 1  | 1  | 1  | 1     | 16    | 88,9% |
| 49                                                                                | 1                               | 1  | 1  | 1  | 1  | 1  | 1  | 1  | 1  | 0  | 0  | 1  | 1  | 0 | 0  | 1  | 0  | 1  | 1     | 13    | 72,2% |
| 64                                                                                | 1                               | 1  | 1  | 1  | 1  | 1  | 0  | 1  | 1  | 0  | 1  | 0  | 1  | 0 | 0  | 0  | 0  | 1  | 0     | 11    | 61,1% |
| 27                                                                                | 1                               | 1  | 1  | 1  | 1  | 1  | 1  | 1  | 1  | 1  | 0  | 0  | 1  | 0 | 0  | 0  | 0  | 0  | 0     | 10    | 55,6% |
| 84                                                                                | 1                               | 1  | 1  | 1  | 0  | 1  | 0  | 0  | 0  | 1  | 1  | 1  | 0  | 0 | 0  | 0  | 1  | 1  | 0     | 10    | 55,6% |
| 16                                                                                | 1                               | 1  | 1  | 1  | 0  | 0  | 0  | 0  | 0  | 1  | 0  | 0  | 0  | 0 | 1  | 0  | 1  | 0  | 0     | 7     | 38,9% |
| 68                                                                                | 0                               | 1  | 1  | 1  | 1  | 1  | 0  | 1  | 0  | 0  | 0  | 0  | 0  | 0 | 1  | 0  | 0  | 0  | 7     | 38,9% |       |
| 80                                                                                | 1                               | 1  | 1  | 1  | 1  | 0  | 0  | 0  | 0  | 1  | 1  | 0  | 0  | 0 | 0  | 0  | 0  | 0  | 7     | 38,9% |       |
| 81                                                                                | 1                               | 1  | 0  | 1  | 1  | 0  | 0  | 1  | 1  | 0  | 0  | 1  | 0  | 0 | 0  | 0  | 0  | 0  | 7     | 38,9% |       |
| 97                                                                                | 1                               | 1  | 1  | 1  | 1  | 0  | 0  | 1  | 0  | 1  | 0  | 0  | 0  | 0 | 0  | 0  | 1  | 0  | 7     | 38,9% |       |
| 57                                                                                | 1                               | 0  | 1  | 1  | 1  | 0  | 1  | 0  | 0  | 0  | 0  | 0  | 0  | 1 | 0  | 0  | 0  | 0  | 6     | 33,3% |       |
| 91                                                                                | 1                               | 1  | 1  | 0  | 1  | 1  | 0  | 1  | 0  | 0  | 0  | 0  | 0  | 0 | 0  | 0  | 0  | 0  | 6     | 33,3% |       |
| 9                                                                                 | 1                               | 1  | 1  | 0  | 1  | 1  | 0  | 0  | 0  | 0  | 0  | 0  | 0  | 0 | 0  | 0  | 0  | 0  | 5     | 27,8% |       |
| 29                                                                                | 1                               | 0  | 1  | 1  | 0  | 0  | 0  | 0  | 0  | 1  | 0  | 0  | 0  | 0 | 1  | 0  | 0  | 0  | 5     | 27,8% |       |
| 40                                                                                | 1                               | 1  | 1  | 0  | 0  | 1  | 0  | 1  | 0  | 0  | 0  | 0  | 0  | 0 | 0  | 0  | 0  | 0  | 5     | 27,8% |       |
| 88                                                                                | 1                               | 0  | 0  | 0  | 1  | 1  | 0  | 1  | 0  | 0  | 0  | 0  | 0  | 0 | 1  | 0  | 0  | 0  | 5     | 27,8% |       |
| 8                                                                                 | 1                               | 0  | 0  | 0  | 0  | 0  | 0  | 0  | 0  | 0  | 0  | 1  | 0  | 0 | 1  | 0  | 0  | 1  | 4     | 22,2% |       |
| 24                                                                                | 0                               | 0  | 0  | 0  | 0  | 0  | 0  | 1  | 0  | 0  | 1  | 0  | 1  | 0 | 0  | 0  | 0  | 1  | 4     | 22,2% |       |
| 31                                                                                | 1                               | 0  | 0  | 1  | 0  | 0  | 0  | 0  | 0  | 0  | 0  | 1  | 0  | 0 | 0  | 1  | 0  | 0  | 4     | 22,2% |       |
| 71                                                                                | 1                               | 1  | 0  | 0  | 0  | 1  | 0  | 0  | 0  | 0  | 0  | 0  | 1  | 0 | 0  | 0  | 0  | 0  | 4     | 22,2% |       |
| 78                                                                                | 1                               | 1  | 0  | 1  | 0  | 0  | 0  | 0  | 0  | 0  | 0  | 0  | 0  | 1 | 0  | 0  | 0  | 0  | 4     | 22,2% |       |
| 14                                                                                | 0                               | 0  | 0  | 1  | 0  | 0  | 0  | 0  | 0  | 1  | 0  | 0  | 0  | 1 | 0  | 0  | 0  | 0  | 3     | 16,7% |       |
| 39                                                                                | 1                               | 1  | 0  | 0  | 0  | 0  | 0  | 0  | 0  | 0  | 0  | 0  | 1  | 0 | 0  | 0  | 0  | 0  | 3     | 16,7% |       |
| 41                                                                                | 0                               | 0  | 0  | 1  | 0  | 0  | 0  | 0  | 0  | 0  | 1  | 0  | 0  | 0 | 1  | 0  | 0  | 0  | 3     | 16,7% |       |
| 60                                                                                | 1                               | 1  | 0  | 0  | 0  | 1  | 0  | 0  | 0  | 0  | 0  | 0  | 0  | 0 | 0  | 0  | 0  | 0  | 3     | 16,7% |       |
| 5                                                                                 | 0                               | 0  | 0  | 0  | 0  | 0  | 0  | 1  | 0  | 0  | 0  | 0  | 1  | 0 | 0  | 0  | 0  | 0  | 2     | 11,1% |       |
| 10                                                                                | 0                               | 0  | 0  | 0  | 0  | 0  | 0  | 0  | 0  | 0  | 1  | 0  | 0  | 0 | 1  | 0  | 0  | 0  | 2     | 11,1% |       |
| 12                                                                                | 0                               | 0  | 0  | 0  | 0  | 0  | 0  | 0  | 0  | 1  | 0  | 0  | 0  | 0 | 1  | 0  | 0  | 0  | 2     | 11,1% |       |
| 15                                                                                | 0                               | 0  | 0  | 0  | 0  | 1  | 0  | 0  | 0  | 0  | 0  | 0  | 1  | 0 | 0  | 0  | 0  | 0  | 2     | 11,1% |       |
| 22                                                                                | 0                               | 0  | 0  | 0  | 0  | 0  | 0  | 1  | 0  | 1  | 0  | 0  | 0  | 0 | 0  | 0  | 0  | 0  | 2     | 11,1% |       |
| 25                                                                                | 0                               | 0  | 0  | 0  | 1  | 0  | 0  | 1  | 0  | 0  | 0  | 0  | 0  | 0 | 0  | 0  | 0  | 0  | 2     | 11,1% |       |
| 28                                                                                | 0                               | 0  | 1  | 0  | 0  | 0  | 0  | 0  | 0  | 0  | 0  | 0  | 0  | 0 | 0  | 0  | 1  | 0  | 2     | 11,1% |       |
| 33                                                                                | 0                               | 0  | 0  | 0  | 0  | 0  | 0  | 0  | 0  | 0  | 1  | 1  | 0  | 0 | 0  | 0  | 0  | 0  | 2     | 11,1% |       |
| 44                                                                                | 0                               | 0  | 0  | 1  | 0  | 0  | 0  | 0  | 0  | 1  | 0  | 0  | 0  | 0 | 0  | 0  | 0  | 0  | 2     | 11,1% |       |
| 50                                                                                | 0                               | 0  | 0  | 0  | 0  | 0  | 1  | 0  | 0  | 0  | 0  | 0  | 1  | 0 | 0  | 0  | 0  | 0  | 2     | 11,1% |       |
| 52                                                                                | 0                               | 0  | 0  | 0  | 0  | 0  | 1  | 1  | 0  | 0  | 0  | 0  | 0  | 0 | 0  | 0  | 0  | 0  | 2     | 11,1% |       |
| 53                                                                                | 0                               | 0  | 1  | 0  | 0  | 0  | 0  | 0  | 0  | 0  | 0  | 0  | 0  | 1 | 0  | 0  | 0  | 0  | 2     | 11,1% |       |
| 55                                                                                | 1                               | 1  | 0  | 0  | 0  | 0  | 0  | 0  | 0  | 0  | 0  | 0  | 0  | 0 | 0  | 0  | 0  | 0  | 2     | 11,1% |       |
| 79                                                                                | 1                               | 1  | 0  | 0  | 0  | 0  | 0  | 0  | 0  | 0  | 0  | 0  | 0  | 0 | 0  | 0  | 0  | 0  | 2     | 11,1% |       |
| 96                                                                                | 0                               | 0  | 0  | 0  | 1  | 0  | 0  | 1  | 0  | 0  | 0  | 0  | 0  | 0 | 0  | 0  | 0  | 0  | 2     | 11,1% |       |
| 1                                                                                 | 0                               | 0  | 1  | 0  | 0  | 0  | 0  | 0  | 0  | 0  | 0  | 0  | 0  | 0 | 0  | 0  | 0  | 0  | 1     | 5,6%  |       |
| 2                                                                                 | 0                               | 0  | 0  | 0  | 0  | 0  | 0  | 0  | 0  | 0  | 0  | 0  | 0  | 0 | 0  | 0  | 1  | 0  | 1     | 5,6%  |       |
| 3                                                                                 | 0                               | 0  | 0  | 0  | 0  | 0  | 0  | 0  | 0  | 0  | 0  | 0  | 0  | 0 | 1  | 0  | 0  | 0  | 1     | 5,6%  |       |
| 6                                                                                 | 0                               | 0  | 0  | 0  | 0  | 0  | 0  | 0  | 0  | 0  | 1  | 0  | 0  | 0 | 0  | 0  | 0  | 0  | 1     | 5,6%  |       |
| 7                                                                                 | 0                               | 0  | 0  | 0  | 0  | 0  | 0  | 0  | 0  | 0  | 1  | 0  | 0  | 0 | 0  | 0  | 0  | 0  | 1     | 5,6%  |       |
| 18                                                                                | 0                               | 0  | 0  | 0  | 0  | 0  | 0  | 1  | 0  | 0  | 0  | 0  | 0  | 0 | 0  | 0  | 0  | 0  | 1     | 5,6%  |       |
| 26                                                                                | 0                               | 0  | 0  | 0  | 0  | 0  | 0  | 0  | 0  | 0  | 0  | 1  | 0  | 0 | 0  | 0  | 0  | 0  | 1     | 5,6%  |       |
| 32                                                                                | 0                               | 0  | 0  | 0  | 0  | 0  | 0  | 0  | 0  | 0  | 0  | 1  | 0  | 0 | 0  | 0  | 0  | 0  | 1     | 5,6%  |       |
| 34                                                                                | 0                               | 0  | 0  | 1  | 0  | 0  | 0  | 0  | 0  | 0  | 0  | 0  | 0  | 0 | 0  | 0  | 0  | 0  | 1     | 5,6%  |       |
| 36                                                                                | 0                               | 0  | 0  | 0  | 0  | 0  | 0  | 0  | 0  | 0  | 0  | 0  | 0  | 0 | 0  | 0  | 0  | 1  | 1     | 5,6%  |       |
| 38                                                                                | 0                               | 0  | 0  | 0  | 1  | 0  | 0  | 0  | 0  | 0  | 0  | 0  | 0  | 0 | 0  | 0  | 0  | 0  | 1     | 5,6%  |       |
| 42                                                                                | 0                               | 0  | 0  | 0  | 0  | 0  | 1  | 0  | 0  | 0  | 0  | 0  | 0  | 0 | 0  | 0  | 0  | 0  | 1     | 5,6%  |       |
| 45                                                                                | 0                               | 0  | 0  | 0  | 0  | 0  | 0  | 0  | 0  | 0  | 0  | 0  | 0  | 0 | 1  | 0  | 0  | 0  | 1     | 5,6%  |       |
| 46                                                                                | 0                               | 0  | 0  | 0  | 0  | 0  | 0  | 0  | 0  | 0  | 0  | 0  | 0  | 0 | 0  | 1  | 0  | 0  | 1     | 5,6%  |       |
| 47                                                                                | 0                               | 0  | 0  | 1  | 0  | 0  | 0  | 0  | 0  | 0  | 0  | 0  | 0  | 0 | 0  | 0  | 0  | 0  | 1     | 5,6%  |       |
| 51                                                                                | 0                               | 0  | 0  | 0  | 0  | 0  | 0  | 0  | 0  | 0  | 1  | 0  | 0  | 0 | 0  | 0  | 0  | 0  | 1     | 5,6%  |       |
| 61                                                                                | 0                               | 0  | 0  | 0  | 0  | 0  | 1  | 0  | 0  | 0  | 0  | 0  | 0  | 0 | 0  | 0  | 0  | 0  | 1     | 5,6%  |       |
| 62                                                                                | 0                               | 0  | 0  | 0  | 0  | 0  | 0  | 0  | 0  | 0  | 0  | 0  | 0  | 1 | 0  | 0  | 0  | 0  | 1     | 5,6%  |       |
| 66                                                                                | 0                               | 0  | 0  | 0  | 0  | 0  | 0  | 1  | 0  | 0  | 0  | 0  | 0  | 0 | 0  | 0  | 0  | 0  | 1     | 5,6%  |       |
| 73                                                                                | 0                               | 0  | 0  | 0  | 0  | 0  | 0  | 0  | 0  | 0  | 0  | 1  | 0  | 0 | 0  | 0  | 0  | 0  | 1     | 5,6%  |       |
| 74                                                                                | 0                               | 0  | 0  | 0  | 0  | 0  | 0  | 0  | 0  | 0  | 0  | 1  | 0  | 0 | 0  | 0  | 0  | 0  | 1     | 5,6%  |       |
| 75                                                                                | 0                               | 1  | 0  | 0  | 0  | 0  | 0  | 0  | 0  | 0  | 0  | 0  | 0  | 0 | 0  | 0  | 0  | 0  | 1     | 5,6%  |       |
| 83                                                                                | 0                               | 0  | 1  | 0  | 0  | 0  | 0  | 0  | 0  | 0  | 0  | 0  | 0  | 0 | 0  | 0  | 0  | 0  | 1     | 5,6%  |       |
| 85                                                                                | 0                               | 0  | 0  | 0  | 0  | 0  | 0  | 0  | 0  | 0  | 1  | 0  | 0  | 0 | 0  | 0  | 0  | 0  | 1     | 5,6%  |       |
| 89                                                                                | 0                               | 0  | 1  | 0  | 0  | 0  | 0  | 0  | 0  | 0  | 0  | 0  | 0  | 0 | 0  | 0  | 0  | 0  | 1     | 5,6%  |       |
| 90                                                                                | 0                               | 0  | 1  | 0  | 0  | 0  | 0  | 0  | 0  | 0  | 0  | 0  | 0  | 0 | 0  | 0  | 0  | 0  | 1     | 5,6%  |       |
| 92                                                                                | 0                               | 1  | 0  | 0  | 0  | 0  | 0  | 0  | 0  | 0  | 0  | 0  | 0  | 0 | 0  | 0  | 0  | 0  | 1     | 5,6%  |       |
| 94                                                                                | 0                               | 0  | 0  | 0  | 0  | 0  | 0  | 0  | 0  | 0  | 0  | 1  | 0  | 0 | 0  | 0  | 0  | 0  | 1     | 5,6%  |       |
| Total                                                                             | 23                              | 21 | 20 | 19 | 14 | 13 | 13 | 13 | 13 | 11 | 11 | 9  | 8  | 7 | 7  | 6  | 5  | 4  | 217   |       |       |
