# Supplementary figures and images for: Early detection of cancer in the general population: a blinded case–control study of p53 autoantibodies in colorectal cancer
Source: PubMed Central journal article supplement — Br J Cancer. 2012 Nov 20;108(1):107–14. doi: 10.1038/bjc.2012.517 (PMC3553520; doi:10.1038/bjc.2012.517), 2012-11-20

Supplementary data 3, Pedersen, Gentry-Maharaj et al.

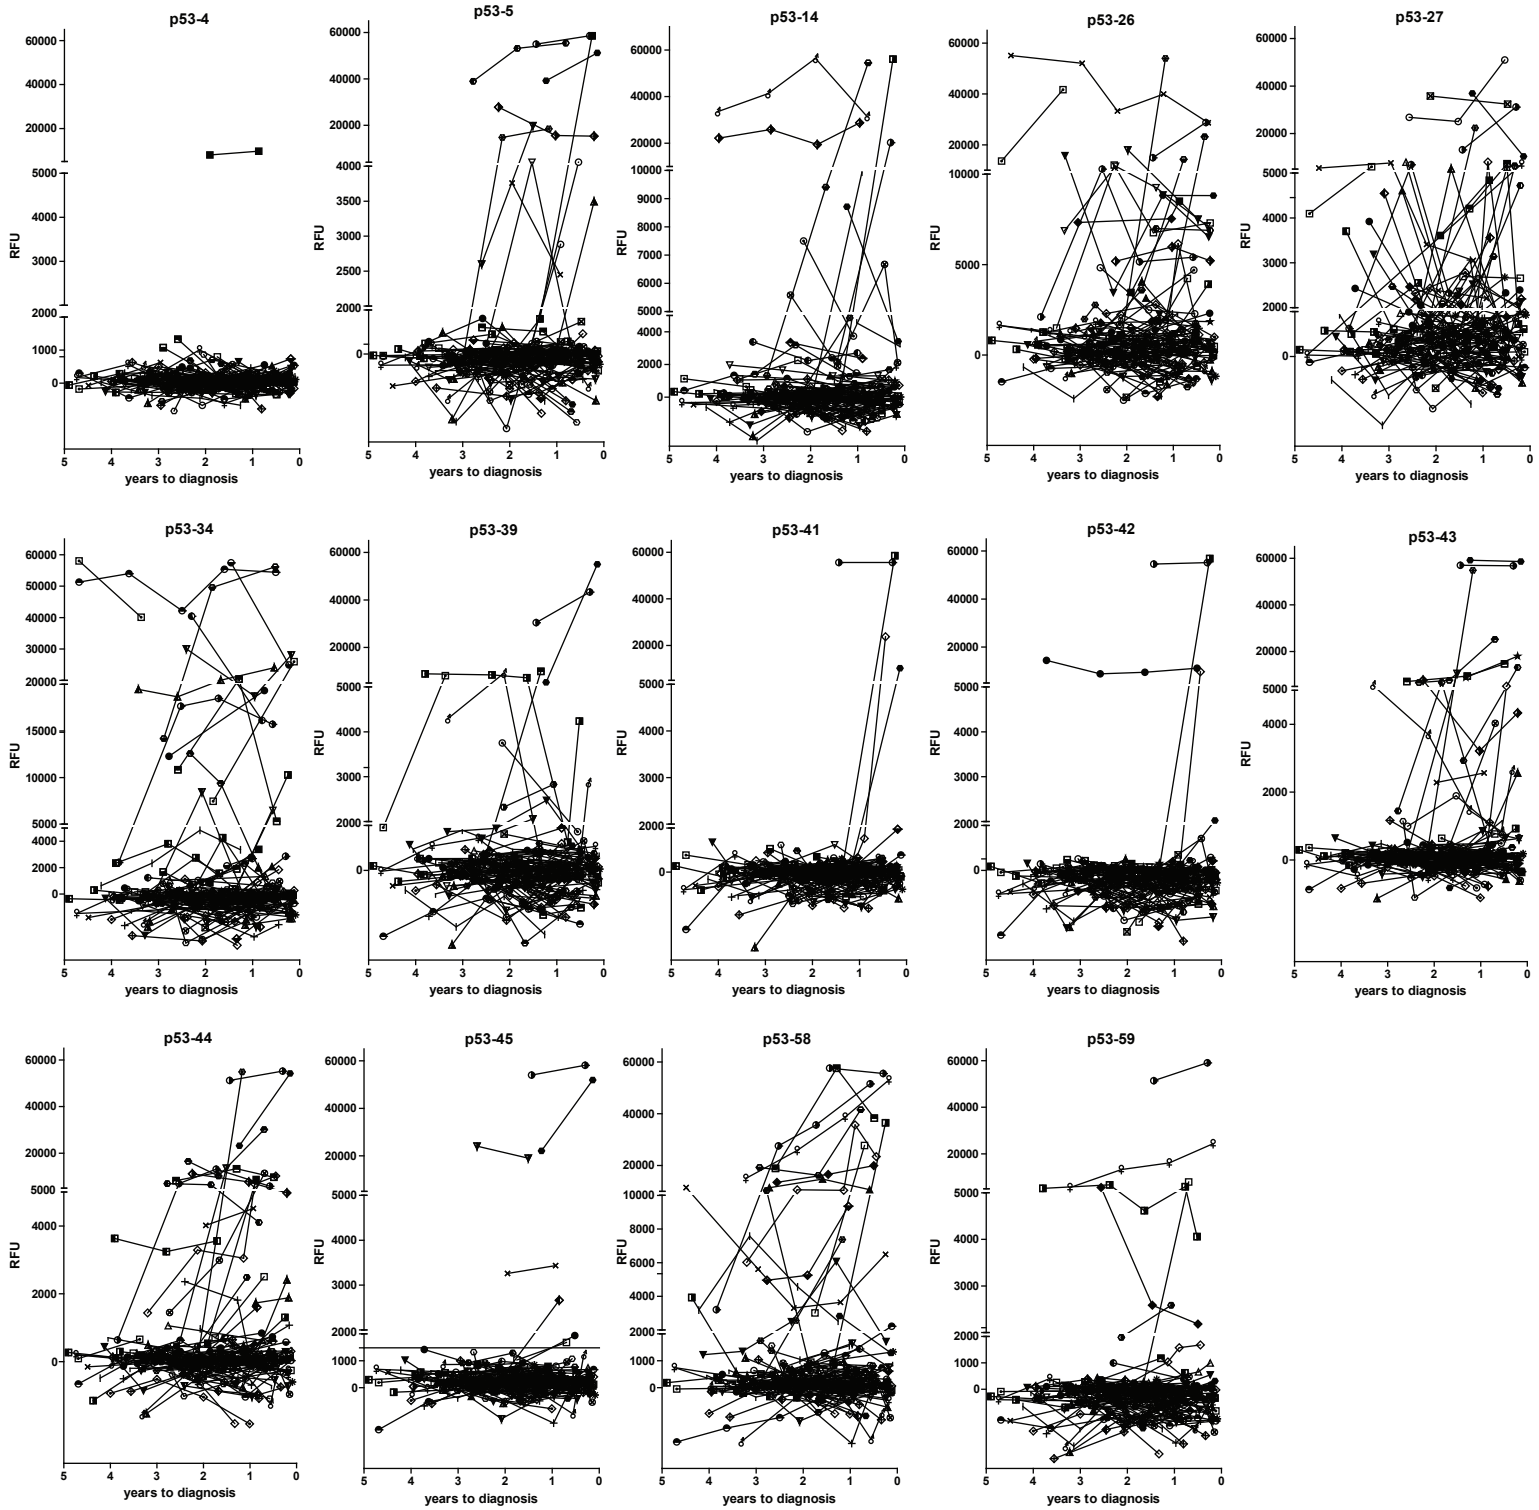

Supplement: bjc2012517x3.pdf [file bjc2012517x3.pdf]

### p53 ELISA

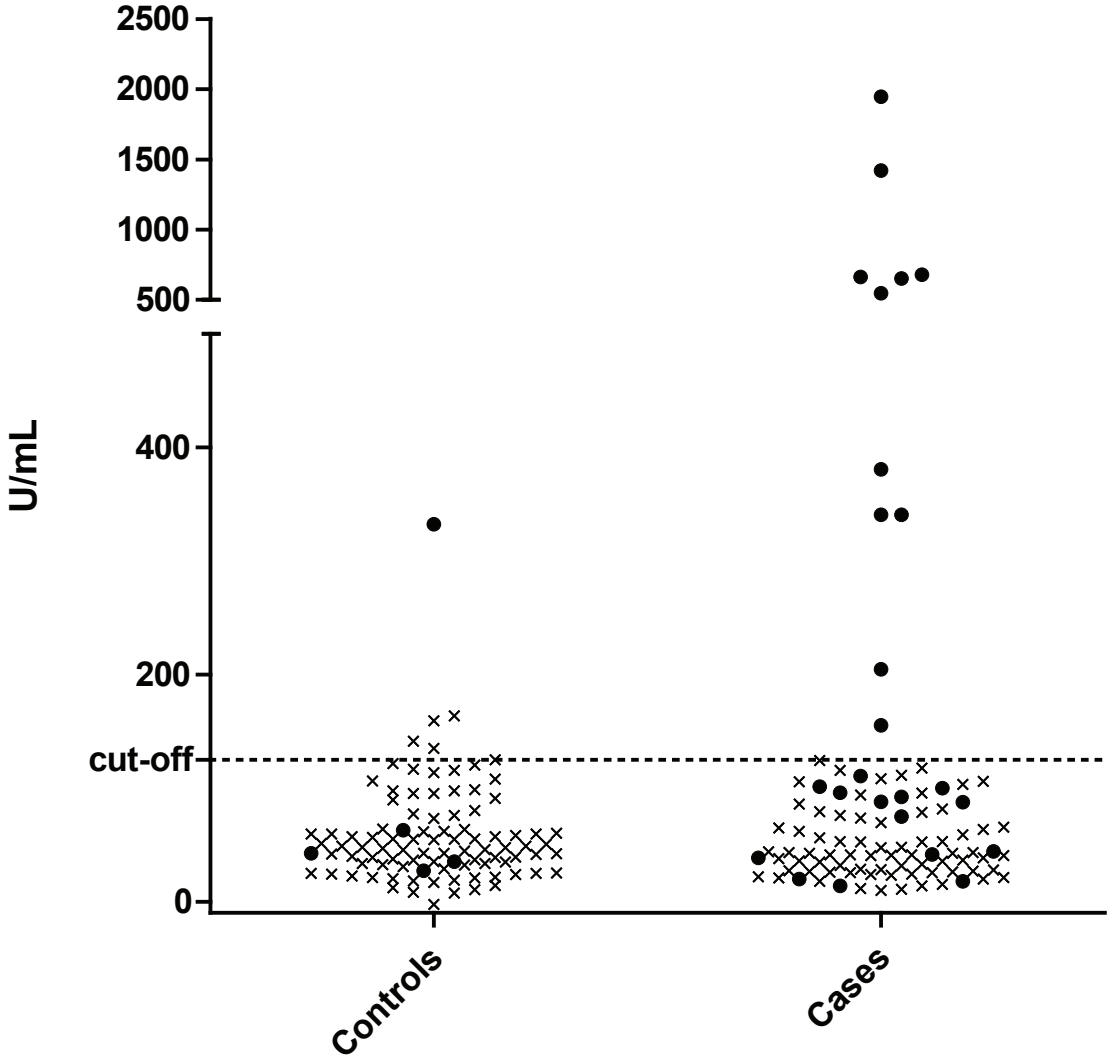

Supplement: bjc2012517x5.pdf [file bjc2012517x5.pdf]
